# Supplementary material
Source: publisher figshare collection journal article supplement (https://sage.figshare.com/ndownloader/files/17906600)
Supplement: Supplementary file 1 [file 17906600]

## Supplemental Material

### A Mass Spectrometric Assay of METTL3/METTL14 Methyltransferase Activity

Shane M. Buker<sup>1</sup>, Zachary A. Gurard-Levin<sup>2</sup>, Benjamin D. Wheeler<sup>3,4</sup>, Michael D. Scholle<sup>2</sup>, April W. Case<sup>1</sup>, Jeffrey L. Hirsch<sup>3</sup>, Scott Ribich<sup>1</sup>, Robert A. Copeland<sup>1</sup>, P. Ann Boriack-Sjodin<sup>1\*</sup>

<sup>1</sup>Accent Therapeutics, Cambridge, MA

<sup>2</sup>SAMDI Tech, Inc, Chicago, IL

<sup>3</sup>Confluence Discovery Technologies, St. Louis, MO

<sup>4</sup>Current address: University of California, San Francisco, Biomedical Science Program

\*Correspondence: P. Ann Boriack-Sjodin, Accent Therapeutics, 65 Hayden Ave, Lexington, MA 02421 E-mail aboriacksjodin@accenttx.com

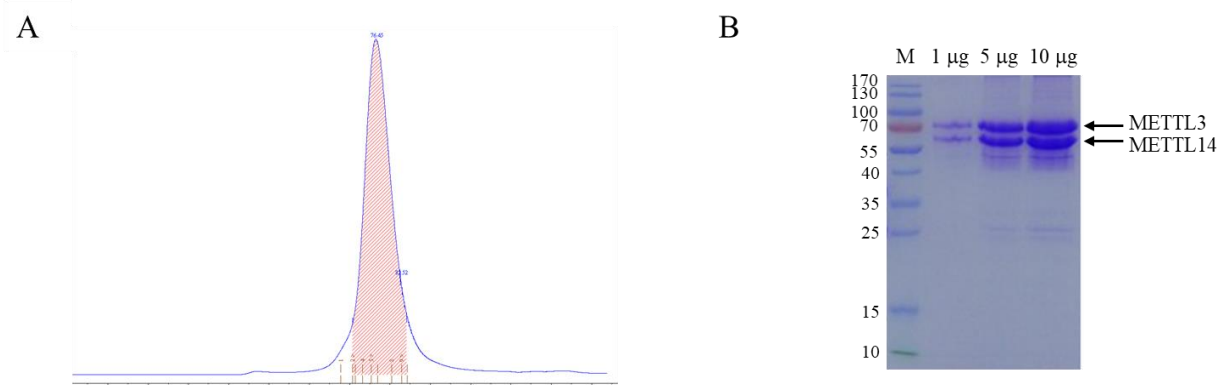

**Supplementary Figure S1:** Characterization of the METTL3/METTL14 protein complex used in assay development. **(A)** METTL3/METTL14 complex elutes from a gel filtration column as a single peak. The final protein solution was generated by combining fractions indicated in red. **(B)** SDS-page gel of the final METTL3/METTL14 complex. Three protein amounts (1 µg, 5 µg and 10 µg) are shown. PageRuler Prestained Protein Ladder molecular weights (Thermo Scientific (#00677289); kD) and bands corresponding to METTL3 and METTL14 are labeled.

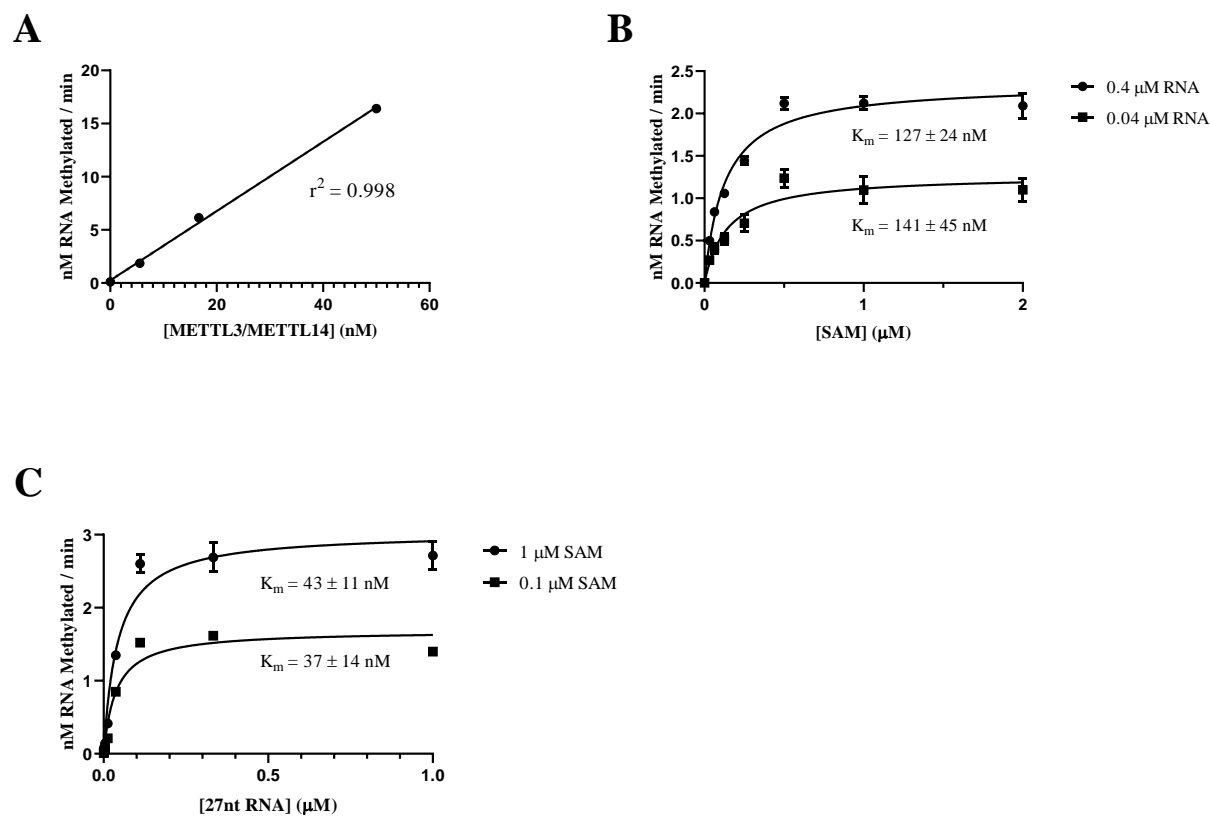

**Supplementary Figure S2:** Characterization of the METTL3/METTL14 radiometric assay using the 27-nucleotide substrate. Velocity was linear over a range of enzyme concentrations (**A**).  $K_M$  values were determined for SAM (**B**) and the 27-nucleotide RNA (**C**) using conditions described in the Materials and Methods section; representative plots are shown. Data was generated in triplicate.

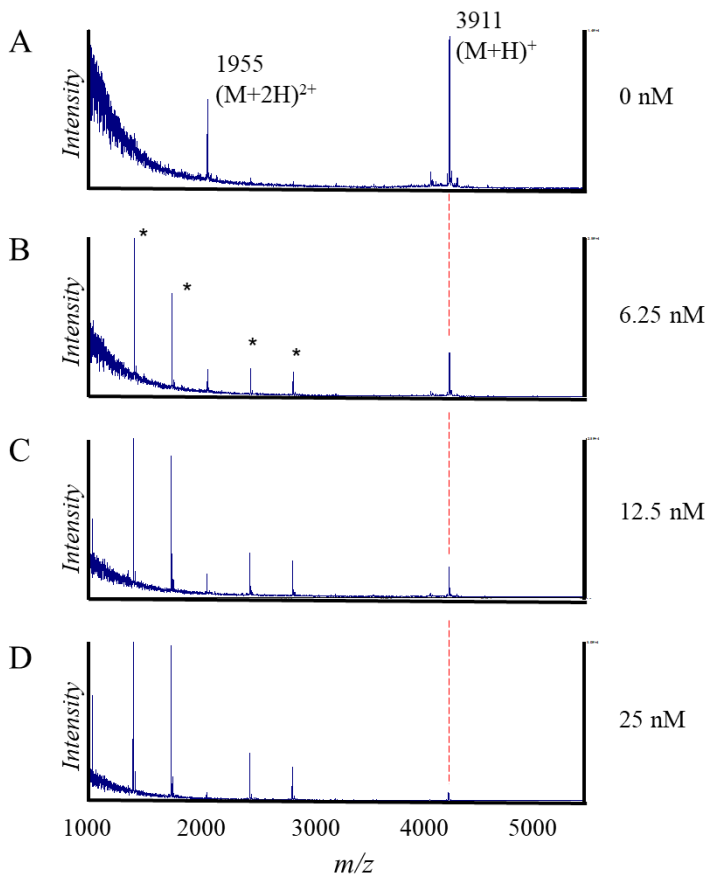

**Supplementary Figure S3:** RNA degradation is seen with increasing concentrations of METTL3/METTL14 protein in the absence of RNaseOUT. **(A)** Peaks from intact substrate (0 nM METTL3/METTL14) are shown as labeled. **(B)** Upon addition of METTL3/METTL14 (6.25 nM), degradation peaks (indicated with \*) are seen. Degradation peaks increase in size with increasing protein concentrations as seen with 12.5 nM METTL3/14 **(C)** and 25 nM METTL3/14 **(D)**. Due to different ionization efficiencies of the degradation products compared to the 11-mer RNA, peak heights and AUC may not directly correlate to the extent of degradation.
